# Supplementary material for: RHOA-regulated IGFBP2 promotes invasion and drives progression of BCR-ABL1 chronic myeloid leukemia
Source: PubMed Central journal article supplement — Haematologica. 2022 Jul 14;108(1):122–34. doi: 10.3324/haematol.2022.280757 (PMC9827165; doi:10.3324/haematol.2022.280757), 2022-07-14
Supplement: 2022_280757_ZHANG_SUPPL.pdf [file 2022_280757_ZHANG_SUPPL.pdf]

# RHOA-regulated IGFBP2 promotes invasion and drives progression of BCR-ABL1 chronic myeloid leukemia

Hualei Zhang,<sup>1,2</sup> Baohuan Cai,<sup>2,3</sup> Yun Liu,<sup>2,4</sup> Yating Chong,<sup>2</sup> Atsuko Matsunaga,<sup>2</sup> Stephanie Fay Mori,<sup>2</sup> Xuexiu Fang,<sup>2</sup> Eiko Kitamura,<sup>2</sup> Chang-Sheng Chang,<sup>2</sup> Ping Wang,<sup>1</sup> John K. Cowell<sup>2</sup> and Tianxiang Hu<sup>2</sup>

<sup>1</sup>Department of Radiation Oncology, Tianjin Medical University Cancer Institute and Hospital, National Clinical Research Center for Cancer, Key Laboratory of Cancer Prevention and Therapy, Tianjin's Clinical Research Center for Cancer, Tianjin, China; <sup>2</sup>Georgia Cancer Center, Augusta University, Augusta, GA, USA; <sup>3</sup>Department of Pediatrics, Tongji Hospital, Tongji Medical College, Huazhong University of Science and Technology, Wuhan, China and <sup>4</sup>Department of Geriatrics, Union Hospital, Tongji Medical College, Huazhong University of Science and Technology, Wuhan, China.

**Correspondence:** J. K. Cowell

[jcowell@augusta.edu](mailto:jcowell@augusta.edu)

T. Hu

[tihu@augusta.edu](mailto:tihu@augusta.edu)

**Received:** January 28, 2022.

**Accepted:** July 7, 2022.

**Prepublished:** July 14, 2022.

<https://doi.org/10.3324/haematol.2022.280757>

©2023 Ferrata Storti Foundation

Published under a CC BY-NC license 

### **Summary of Antibodies used in this study.**

Antibodies used for western blotting were (dilution 1:1000):  $\beta$ -Actin (Cell Signaling, #5125), RHOA (Cell Signaling, #2117), IGFBP2 (Cell Signaling, #3922), IL20RB (ABclonal, A7980), CD24 (Santa Cruz, sc-19585), GAPDH (Santa Cruz, sc-25778), Lamin A (Santa Cruz, sc-518013), SRF (Cell Signaling, #5147).

### **Design of sgRNAs used in this study.**

For locus-specific deletion of RHOA in CML cells, we designed two 20 nucleotides (nt) guide sgRNAs targeting the 5' and 3' flanking regions of the gene (sgRNA1: 5'-*AATCACCAGTTTCTTCCGGA* -3'; sgRNA2: 5'-*CTGCTCTGCAAGCTAGACGT* -3'), using CRISPR Targets Track on Genome Browser. Two additional sgRNAs, sgRNA3: 5'-*AGTCTGGGTCCGTTCCACGC* -3' and sgRNA4: 5'-*GTGAACATTTGACTCGACGG* -3' were used for generation of IGFBP2 knockout clones. The mock control clones were generated using the non-targeting sgRNA sequence 5'-*AAAUGUGAGAUCAGAGUAAU* -3' (Thermo Fisher Scientific).

### **Summary of primers used in CHIP analyses.**

ChIP-qPCR primers P1 were designed to amplify a proximal promoter region containing two putative serum response elements (SREs) (5'-*CTCCAAAAGGGGGA* -3' and 5'-*GCCCTTTAGGACCCG*-3'), with P1 forward primer 5'-*GAAGAGTGCGGAGGGACG* -3' and P1 reverse primer 5'-*GGTCCTAAAGGGCCGGCTT* -3'. Another primer pair, P2, targeting an intronic region, was selected as a negative control, with P2 forward primer 5'-*GTCCTTGGGGAGACAGAACG* -3' and P2 reverse primer 5'-*AGGCCTGAGAACTGAAAGCC* -3'.
